# Supplementary material for: A Pareto approach to resolve the conflict between information gain and experimental costs: Multiple-criteria design of carbon labeling experiments
Source: PubMed Central journal article supplement (PMC6209137; doi:10.1371/journal.pcbi.1006533), 2018-10-31
Supplement: pcbi.1006533.s003.pdf [file pcbi.1006533.s003.pdf]

Supplementary Appendix 3 for

**A Pareto approach to resolve the conflict between  
information gain and experimental costs:  
Multiple-criteria design of carbon labeling experiments**

**<sup>13</sup>C MFA network model of *P. chrysogenum***

Katharina Nöh, Sebastian Niedenführ, Martin Beyß, Wolfgang Wiechert

[k.noeh@fz-juelich.de](mailto:k.noeh@fz-juelich.de)

**Contents**

1. Network Model .....2

## 1. Network Model

**Table A.** Metabolic network model and carbon atom mappings of *P. chrysogenum* used for the multi-objective experimental design study. Reaction arrows indicate uni- and bidirectional reactions, respectively. For effluxes extracellular pools are omitted. Reactions with empty brackets “()” provide stoichiometric relations only. Association of metabolites with compartments other than the cytosol is indicated by brackets “[ ]” (ex: extracellular, mit: mitochondrial).

| Reaction       | Stoichiometry and carbon atom mappings                |
|----------------|-------------------------------------------------------|
| gly1:          | GLC[ex](#ABCDEF) → G6P(#ABCDEF)                       |
| gly2:          | G6P(#ABCDEF) ⇌ F6P(#AFBCDE)                           |
| gly3:          | F6P(#ABCDEF) → FBP(#ABCDEF)                           |
| gly4:          | FBP(#ABCDEF) ⇌ DHAP(#EBF) + GAP(#DAC)                 |
| gly4b:         | DHAP(#ABC) ⇌ GAP(#ABC)                                |
| gly5:          | GAP(#ABC) ⇌ 23PG(#BCA)                                |
| gly6:          | 23PG(#ABC) ⇌ PEP(#ABC)                                |
| gly7:          | PEP(#ABC) → PYR(#ABC)                                 |
| Ppp1:          | G6P(#ABCDEF) → 6PG(#DACEBF)                           |
| Ppp2:          | 6PG(#ABCDEF) → Ru5P(#DBAEC) + CO2(#F)                 |
| Ppp3:          | Ru5P(#ABCDE) ⇌ X5P(#ABCDE)                            |
| Ppp4:          | Ru5P(#ABCDE) ⇌ R5P(#BDECA)                            |
| Ppp5:          | X5P(#ABCDE) + R5P(#FGHIJ) ⇌ GAP(#EBD) + S7P(#AFCGJHI) |
| Ppp6:          | GAP(#ABC) + S7P(#DEFGHIJ) ⇌ F6P(#BDCAHF) + E4P(#JEIG) |
| Ppp7:          | E4P(#ABCD) + X5P(#EFGHI) ⇌ F6P(#BEDCAG) + GAP(#IFH)   |
| Help_Ru5P:     | Ru5P(#ABCDE) → Ru5P_X5P(#ABCDE)                       |
| Help_X5P:      | X5P(#ABCDE) → Ru5P_X5P(#ABCDE)                        |
| Help_Ru5P_X5P: | Ru5P_X5P(#ABCDE) →                                    |
| Tca1:          | PYR[mit](#ABC) → ACCOA[mit](#AB) + CO2[mit](#C)       |
| Tca2:          | OAA[mit](#ABCD) + ACCOA[mit](#EF) → CIT[mit](#AECFDB) |
| Tca3:          | CIT[mit](#ABCDEF) → ACO[mit](#ABFCDE)                 |
| Tca4:          | ACO[mit](#ABCDEF) → AKG[mit](#CBAED) + CO2[mit](#F)   |
| Tca5a:         | AKG[mit](#ABCDE) ⇌ SUC[mit](#BADC) + CO2[mit](#E)     |
| Tca5b:         | AKG[mit](#ABCDE) ⇌ SUC[mit](#ABCD) + CO2[mit](#E)     |
| Tca6a:         | SUC[mit](#ABCD) ⇌ FUM[mit](#ABCD)                     |
| Tca6b:         | SUC[mit](#ABCD) ⇌ FUM[mit](#BADC)                     |
| Tca7a:         | FUM[mit](#ABCD) ⇌ MAL[mit](#BADC)                     |
| Tca7b:         | FUM[mit](#ABCD) ⇌ MAL[mit](#ABCD)                     |
| Tca8:          | MAL[mit](#ABCD) ⇌ OAA[mit](#ABCD)                     |
| Ana1:          | OAA(#ABCD) ⇌ PEP(#ABD) + CO2(#C)                      |
| Ana2:          | PYR(#ABC) + CO2(#D) ⇌ OAA(#ABDC)                      |
| Ana3:          | PYR[mit](#ABC) + CO2[mit](#D) ⇌ MAL[mit](#ABDC)       |
| Ac:            | PYR(#ABC) → CO2(#C) + ACCOA(#AB)                      |

| Reaction | Stoichiometry and carbon atom mappings                                          |
|----------|---------------------------------------------------------------------------------|
| Ser1:    | 23PG(#ABC) → PHP(#ABC)                                                          |
| Ser2:    | PHP(#ABC) → PSer(#ABC)                                                          |
| Ser3:    | PSer(#ABC) → SER(#ABC)                                                          |
| Ser4:    | SER(#ABC) + ACCOA(#DE) → OACSER(#DAEBC)                                         |
| Gly1:    | SER(#ABC) ⇌ EC1(#A) + GLY(#BC)                                                  |
| Gly2:    | EC1(#A) + CO2(#B) ⇌ GLY(#AB)                                                    |
| Cys1:    | OACSER(#ABCDE) → CYS(#BDE) + ACCOA(#AC)                                         |
| Cys2:    | CYS(#ABC) + CYS(#DEF) → CYST(#DAEBFC)                                           |
| His:     | R5P(#ABCDE) + EC1(#F) → HIS(#CEFDBA)                                            |
| Chor:    | E4P(#ABCD) + PEP(#EFG) + PEP(#HIJ) → CHOR(#EBDHFICAGJ)                          |
| Phe:     | CHOR(#ABCDEFGHIJ) → PHE(#GCHBDAFEI) + CO2(#J)                                   |
| Tyr:     | CHOR(#ABCDEFGHIJ) → TYR(#DBHCAFGEI) + CO2(#J)                                   |
| Met:     | EC1(#A) + ASP(#BCDE) → MET(#ABDCE)                                              |
| Trp1:    | CHOR(#ABCDEFGHIJ) → PYR(#AEI) + ANT(#CGBHFDJ)                                   |
| Trp2:    | ANT(#ABCDEFG) + R5P(#HIJKL) → ANT2(#ABCDLHEFKIJG)                               |
| Trp3:    | ANT2(#ABCDEFGHIJKL) → CO2(#L) + ANT3(#ABCDEFGHIJK)                              |
| Trp4:    | ANT3(#ABCDEFGHIJK) → TRP(#ABCDKEHGJIF)                                          |
| Ala:     | PYR[mit](#ABC) → ALA[mit](#ABC)                                                 |
| Val1:    | PYR[mit](#ABC) + PYR[mit](#DEF) → CO2[mit](#C) + DHIV[mit](#ADEFB)              |
| Val2:    | DHIV[mit](#ABCDE) → KIV(#ABECD)                                                 |
| Val3:    | KIV(#ABCDE) → VAL(#ABCDE)                                                       |
| Leu:     | PYR[mit](#ABC) + PYR[mit](#DEF) + ACCOA(#GH) → LEU(#DABEGH) + CO2(#F) + CO2(#C) |
| Ileu1:   | PYR[mit](#ABC) + ASP(#DEFG) → CO2(#C) + KILE(#FADBEG)                           |
| Ileu2:   | KILE(#ABCDEF) → ILE(#ABCDEF)                                                    |
| Arg:     | AKG[mit](#ABCDE) + EC1(#F) → ARG(#BADCEF)                                       |
| Glu1:    | AKG[mit](#ABCDE) → GL[mit](#ABCDE)                                              |
| Glu2:    | GLU[mit](#ABCDE) → PRO[mit](#BADCE)                                             |
| Glu3:    | GLU[mit](#ABCDE) → GLN[mit](#ABCDE)                                             |
| Glu4:    | GLU[mit](#ABCDE) → ORN[mit](#BADCE)                                             |
| Lys1:    | AKG[mit](#ABCDE) + ACCOA(#FG) → CO2(#E) + AAA(#BDAFCG)                          |
| Lys2:    | AAA(#ABCDEF) → LYS(#ACBEDF)                                                     |
| Asp1:    | OAA(#ABCD) → ASP(#ABCD)                                                         |
| Asp1b:   | OAA[mit](#ABCD) → ASP(#ABCD)                                                    |
| Asp2:    | ASP(#ABCD) → ASN(#ABCD)                                                         |
| Thr1:    | ASP(#ABCD) → HSER(#ACBD)                                                        |
| Thr2:    | ACCOA(#AB) + GLY(#CD) ⇌ THR(#ABCD)                                              |
| Thr3:    | HSER(#ABCD) → THR(#BACD)                                                        |
| Poa_IN:  | POA_IN() → POA()                                                                |
| Pen1:    | POA() + IPN(#ABCDEF) → PENV() + AAA(#ABCDEF)                                    |

| Reaction           | Stoichiometry and carbon atom mappings |
|--------------------|----------------------------------------|
| Pen2:              | CV() + AAA(#ABCDEF) → IPN(#ABCDEF)     |
| Pen3:              | PENV() → BYPROD()                      |
| Pen_Syn_VAL:       | VAL(#ABCDE) →                          |
| Pen_Syn_CYS:       | CYS(#ABC) →                            |
| Transporter_PYR:   | PYR(#ABC) → PYR[mit](#ABC)             |
| Transporter_OAA:   | OAA(#ABCD) ⇌ OAA[mit](#ABCD)           |
| Transporter_ACCOA: | ACCOA(#AB) ⇌ ACCOA[mit](#AB)           |
| Transporter CO2:   | CO2(#A) → CO2[mit](#A)                 |
| BM_AAA:            | AAA(#ABCDEF) →                         |
| BM_ACCOA:          | ACCOA(#AB) →                           |
| BM_ALA:            | ALA[mit](#ABC) →                       |
| BM_ARAB:           | Ru5P(#ABCDE) →                         |
| BM_ARG:            | ARG(#ABCDEF) →                         |
| BM_ASN:            | ASN(#ABCD) →                           |
| BM_ASP:            | ASP(#ABCD) →                           |
| BM_CIT:            | CIT(#ABCDEF) →                         |
| BM_CO2:            | CO2(#A) →                              |
| BM_CYS:            | CYS(#ABC) →                            |
| BM_CYST:           | CYST(#ABCDEF) →                        |
| BM_E4P:            | E4P(#ABCD) →                           |
| BM_EC1:            | EC1(#A) →                              |
| BM_F6P:            | F6P(#ABCDEF) →                         |
| BM_FUM:            | FUM[mit](#ABCD) →                      |
| BM_GAL:            | G6P(#ABCDEF) →                         |
| BM_GAP:            | GAP(#ABC) →                            |
| BM_GLN:            | GLN[mit](#ABCDE) →                     |
| BM_GLU:            | GLU[mit](#ABCDE) →                     |
| BM_GLUC:           | G6P(#ABCDEF) →                         |
| BM_GLY:            | GLY(#AB) →                             |
| BM_HIS:            | HIS(#ABCDEF) →                         |
| BM_AKG:            | AKG[mit](#ABCDE) →                     |
| BM_ILE:            | ILE(#ABCDEF) →                         |
| BM_LEU:            | LEU(#ABCDEF) →                         |
| BM_LYS:            | LYS(#ABCDEF) →                         |
| BM_MAN:            | F6P(#ABCDEF) →                         |
| BM_MANNNOSE:       | F6P(#ABCDEF) →                         |
| BM_MET:            | MET(#ABCDE) →                          |
| BM_ORN:            | ORN[mit] (#ABCDE) →                    |
| BM_PHE:            | PHE(#ABCDEFGHI) →                      |
| BM_PRO:            | PRO[mit] (#ABCDE) →                    |
| BM_R5P:            | R5P(#ABCDE) →                          |

| Reaction         | Stoichiometry and carbon atom mappings                                                                                                                                                                                                                                                                                                                                                                                                                     |
|------------------|------------------------------------------------------------------------------------------------------------------------------------------------------------------------------------------------------------------------------------------------------------------------------------------------------------------------------------------------------------------------------------------------------------------------------------------------------------|
| BM_SER:          | SER(#ABC) →                                                                                                                                                                                                                                                                                                                                                                                                                                                |
| BM_THR:          | THR(#ABCD) →                                                                                                                                                                                                                                                                                                                                                                                                                                               |
| BM_TRP:          | TRP(#ABCDEFGHIJK) →                                                                                                                                                                                                                                                                                                                                                                                                                                        |
| BM_TYR:          | TYR(#ABCDEFGHI) →                                                                                                                                                                                                                                                                                                                                                                                                                                          |
| BM_VAL:          | VAL(#ABCDE) →                                                                                                                                                                                                                                                                                                                                                                                                                                              |
| CO2_EX:          | CO2(#A) →                                                                                                                                                                                                                                                                                                                                                                                                                                                  |
| bisACV_IPN_EX:I: | PN(#ABCDEF) →                                                                                                                                                                                                                                                                                                                                                                                                                                              |
| PEN_EX:          | PENV() →                                                                                                                                                                                                                                                                                                                                                                                                                                                   |
| BYPROD_EX:       | BYPROD() →                                                                                                                                                                                                                                                                                                                                                                                                                                                 |
| BIOM_EX:         | BIOMass() →                                                                                                                                                                                                                                                                                                                                                                                                                                                |
| BIOM_IN:         | 0.0299*AAA+0.8743*ACCOA+0.3005*ALA+0.0095*ARAB+<br>0.2130*ARG+0.1958*ASN+0.2837*ASP+0.0011*CIT+<br>0.1550*CO2+0.0039*Cyst+0.0157*E4P+0.1344*EC1+0.0711*F6P+<br>0.0007*FUM+0.2966*GAL+0.1427*GAP+0.2819*GLN+0.0950*GLUC<br>+0.5656*GLU+0.4224*GLY+0.0798*HIS+0.2102*ILE+0.3143*LEU+<br>0.1900*LYS+0.3581*MAN+0.1956*MANNOSE+0.0665*MET+<br>0.0044*ORN+0.1617*PHE+0.1273*PRO+0.1550*R5P+0.2841*SER+<br>0.2349*THR+0.0398*TRP+0.1247*TYR+0.3103*VAL → BIOMass |

**Table B.** Equality constraints for net (.n) and exchange (.x) fluxes in [mmol/(g<sub>CDW</sub>·h)].

|                          |
|--------------------------|
| BM_CYS.n = 0.000001      |
| Help_Ru5P_X5P.n = 0.0001 |
| Pen_Syn_VAL.n = Pen2.n   |
| Pen_Syn_CYS.n = Pen2.n   |
| Tca5a.n - Tca5b.n = 0    |
| Tca6a.n - Tca6b.n = 0    |
| Tca7a.n - Tca7b.n = 0    |
| Tca5a.x - Tca5b.x = 0    |
| Tca6a.x - Tca6b.x = 0    |
| Tca7a.x - Tca7b.x = 0    |

**Table C.** Inequality constraints for net (.n) and exchange (.x) fluxes in [mmol/(g<sub>CDW</sub>·h)].

|                         |
|-------------------------|
| Ac3.n ≥ 0               |
| Ana1.n ≥ 0              |
| Ana1.n ≤ gly6.n         |
| Ana2.n ≥ 0              |
| Ana3.n ≤ 0              |
| gly7.n ≤ gly6.n         |
| Gly1.n ≥ 0              |
| Ppp1.n ≥ 0              |
| Thr2.n ≤ 0              |
| Transporter_ACCOA.n ≥ 0 |

**Table D.** Flux values of independent (free) fluxes (.n – net flux, .x – exchange flux).

| Free fluxes         | Flux value<br>[mmol/(g <sub>CDW</sub> -h)] | GC-<br>MS | LC-<br>MS | LC-<br>MS/MS | <sup>13</sup> C-<br>NMR | <sup>1</sup> H-<br>NMR | GC-C-<br>IRMS |
|---------------------|--------------------------------------------|-----------|-----------|--------------|-------------------------|------------------------|---------------|
| ByProd_ex.n         | 0.0049                                     | ×         | ×         | ×            | ×                       | ×                      | ×             |
| Ana1.n              | 0.0125                                     | ×         | ×         | ×            | ×                       | ×                      | ×             |
| Ana1.x              | 140.6222                                   | ×         | ×         | ×            | ×                       | ×                      | ×             |
| Ana2.x              | 5.0e-07                                    | ×         | ×         | ×            | ×                       | ×                      | ×             |
| Ana3.x              | 5.0e-07                                    |           |           |              |                         |                        | ×             |
| Asp1b.n             | 0.0272                                     |           |           |              |                         | ×                      | ×             |
| CO2_ex.n            | 1.3014                                     |           |           |              |                         |                        |               |
| gly2.x              | 700.5319                                   | ×         | ×         | ×            | ×                       |                        | ×             |
| Gly1.n              | 0.4530                                     |           |           |              |                         |                        |               |
| Gly1.x              | 0.0279                                     |           |           |              |                         |                        | ×             |
| Gly2.x              | 0.0056                                     |           |           |              |                         | ×                      | ×             |
| gly4.x              | 0.4530                                     | ×         | (×)       | (×)          | ×                       | ×                      | ×             |
| gly4b.x             | 2.4203                                     | ×         | (×)       | (×)          | ×                       | ×                      | ×             |
| gly5.x              | 0.0623                                     | (×)       | (×)       | (×)          | ×                       | ×                      | ×             |
| gly6.x              | 0.5386                                     | (×)       | (×)       | (×)          | ×                       | ×                      | ×             |
| gly7.n              | 0.5543                                     |           |           |              |                         |                        |               |
| Help_Ru5P.n         | 5.0e-07                                    |           |           |              |                         | ×                      | ×             |
| Ppp2.n              | 0.2881                                     |           |           |              |                         |                        | ×             |
| Ppp3.x              | 2.5896                                     | (×)       | (×)       | (×)          | ×                       | ×                      | ×             |
| Ppp4.x              | 0.1570                                     |           |           |              |                         | ×                      | ×             |
| Ppp5.x              | 0.0490                                     |           |           |              |                         |                        | ×             |
| Ppp6.x              | 0.5402                                     |           |           |              |                         | ×                      | ×             |
| Ppp7.x              | 5.0e-07                                    |           |           |              |                         |                        | ×             |
| Tca1.n              | 0.3805                                     |           |           |              |                         | ×                      |               |
| Tca5b.x             | 0.0370                                     |           |           |              |                         | ×                      | ×             |
| Tca6a.x             | 5.0e-07                                    |           |           |              |                         | ×                      | ×             |
| Tca7a.x             | 1.2058                                     |           |           |              |                         | ×                      | ×             |
| Tca8.n              | 0.2919                                     |           |           |              |                         |                        |               |
| Tca8.x              | 202.9183                                   | ×         | ×         | ×            | ×                       | ×                      | ×             |
| Thr2.x              | 104.9220                                   | ×         | ×         | ×            | ×                       | ×                      | ×             |
| Transporter_ACCOA.x | 5.0e-07                                    |           |           |              |                         |                        | ×             |
| Transporter_CO2.n   | 1.0419                                     |           |           |              |                         | ×                      | ×             |
| Transporter_OAA.x   | 0.2046                                     | ×         | ×         | ×            | (×)                     | ×                      | ×             |
| Transporter_PYR.n   | 0.4688                                     |           |           |              |                         | ×                      | ×             |

**Table E.** Flux values of independent (free) fluxes (.n – net flux, .x – exchange flux).

| Free fluxes                      | GC-MS | LC-MS | LC-MS/MS | <sup>13</sup> C-NMR | <sup>1</sup> H-NMR | GC-C-IRMS |
|----------------------------------|-------|-------|----------|---------------------|--------------------|-----------|
| # statistically identifiable     | 24    | 26    | 26       | 22                  | 11                 | 5         |
| # statistically non-identifiable | 10    | 8     | 8        | 12                  | 23                 | 29        |

Out of the in total 34 free fluxes, several fluxes had to be constrained to ensure comparability among different analytical platforms. Fluxes marked with “x” were statistically non-identifiable. The symbol “(x)” indicates fluxes which were statistically identifiable but are set to constant values to guarantee comparability between models for different measurement setups, i.e., equal nominal model dimensionality (s. a. the main text or further explanation). The statistical flux (non-)identifiability study was performed with 60% [1-<sup>13</sup>C]-glucose, 20% [U-<sup>13</sup>C]-glucose and 20% [<sup>12</sup>C]-glucose as substrate mixture.

**Table F.** Extracellular rate measurements with associated standard deviations in [mmol/(g<sub>CDW</sub>·h)].

---

gly1.n = 0.1169 ± 0.00865

POA\_IN.n = 0.0160 ± 0.00739

PEN2.n = 0.0107 ± 0.00259

BIOM\_EX = 0.0085 ± 0.00207

---

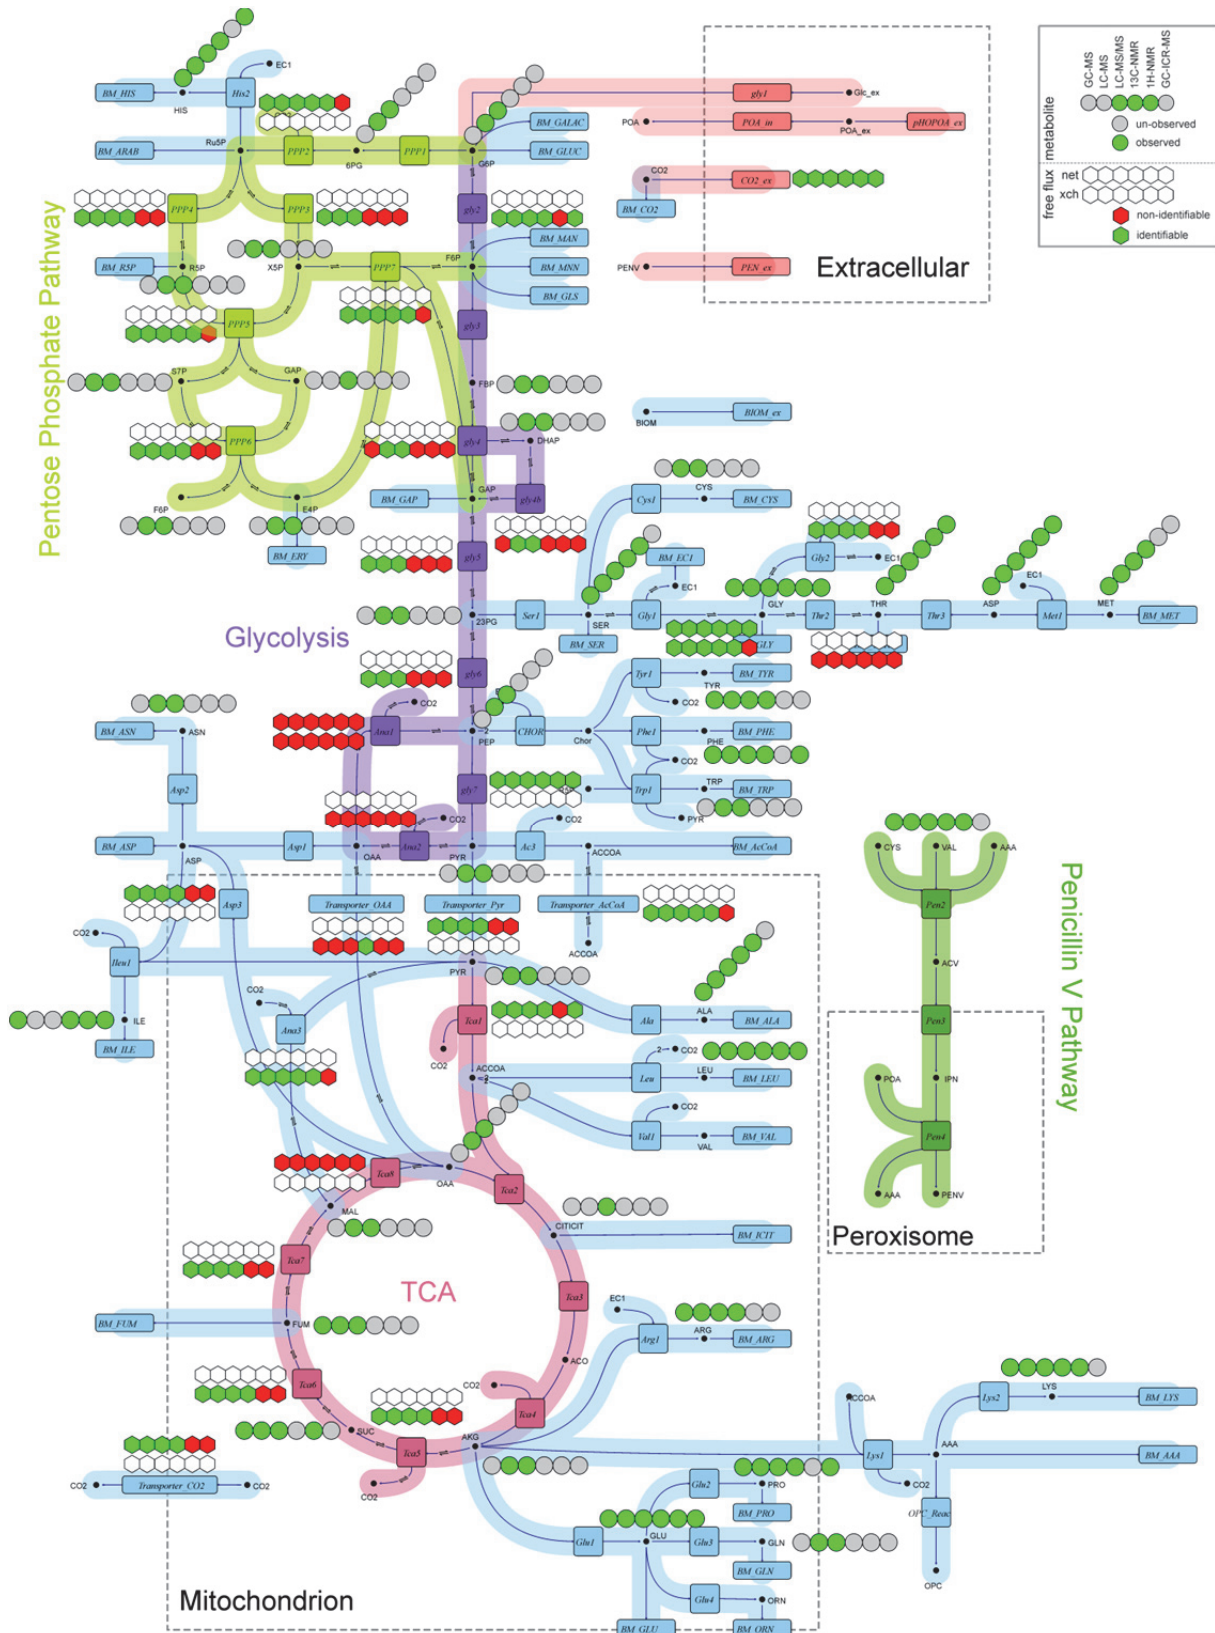

**Fig A.** Metabolic map indicating labeling measurements and statistically identifiable and non-identifiable free fluxes (green and red hexagons, respectively) resolved by analytical platforms GC-MS, LC-MS, LC-MS/MS, <sup>1</sup>H-NMR, and <sup>13</sup>C-NMR (green cycles: observed, grey cycle un-observed).
